# Supplementary material
Source: PubMed Central journal article supplement (PMC3438938)
Supplement: supp_M112.346213_jbc.M112.346213-3.pdf [file supp_M112.346213_jbc.M112.346213-3.pdf]

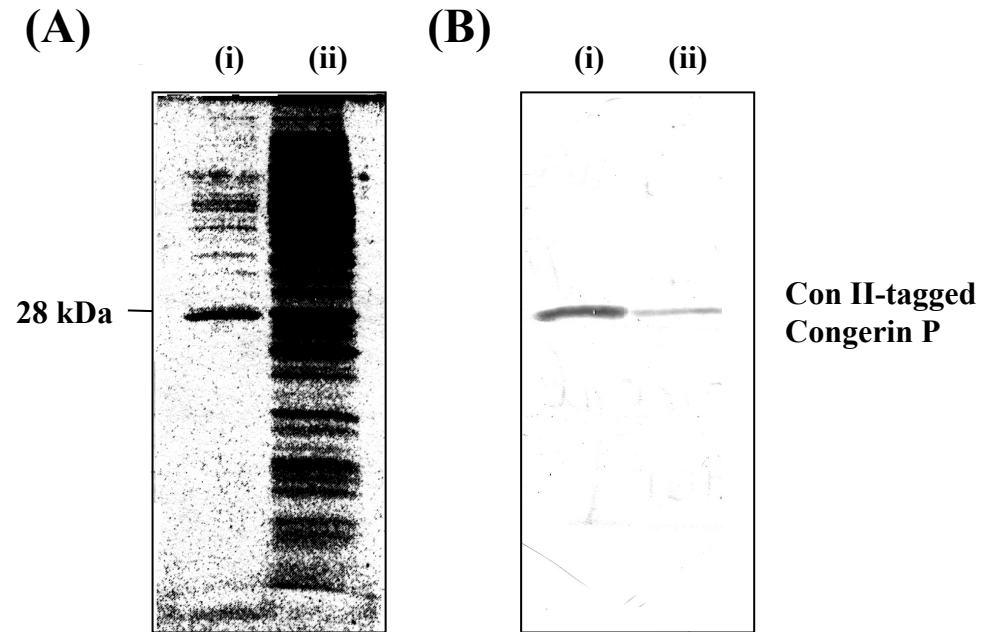

**FIGURE S2.** Purification of Con II-tagged Con-P by affinity chromatography on an HCl-treated sepharose 4B column  
(A) SDS-PAGE with CBB staining. (B) Western blot analysis using the anti-Con II antibody. (i) Adsorbed fraction. (ii) Flow-through fraction.
