# Supplementary material
Source: PubMed Central journal article supplement (PMC3438938)
Supplement: supp_M112.346213_jbc.M112.346213-4.pdf [file supp_M112.346213_jbc.M112.346213-4.pdf]

1. Q16-K33

| Residue | b         | y         |
|---------|-----------|-----------|
| Q       | 112.0393  | 1901.9491 |
| L       | 225.1234  | 1790.9171 |
| T       | 326.1710  | 1677.8330 |
| I       | 439.2551  | 1576.7853 |
| N(Dea)  | 554.2821  | 1463.7013 |
| G       | 611.3035  | 1348.6743 |
| V       | 710.3719  | 1291.6529 |
| P       | 807.4247  | 1192.5844 |
| D       | 922.4516  | 1095.5317 |
| D       | 1037.4786 | 980.5005  |
| S       | 1124.5106 | 865.4778  |
| F       | 1271.5790 | 778.4458  |
| T       | 1372.6267 | 631.3774  |
| I       | 1485.7108 | 530.3297  |
| N       | 1599.7537 | 417.2456  |
| V       | 1698.8221 | 303.2027  |
| G       | 1755.8436 | 204.1343  |
| K       | 1883.9385 | 147.1128  |

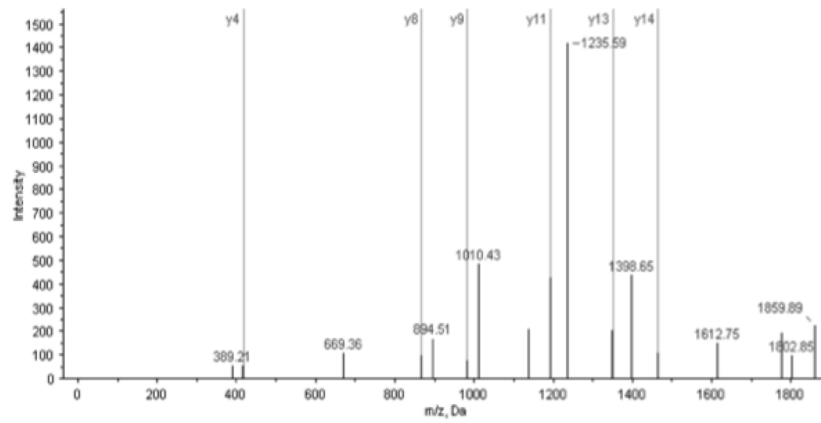

2. Y42-K48

| Residue | b        | y        |
|---------|----------|----------|
| Y       | 164.0706 | 898.4781 |
| E       | 293.1132 | 735.4148 |
| V       | 392.1816 | 606.3722 |
| R       | 548.2827 | 507.3038 |
| F       | 695.3511 | 351.2027 |
| G       | 752.3726 | 204.1343 |
| K       | 880.4676 | 147.1128 |

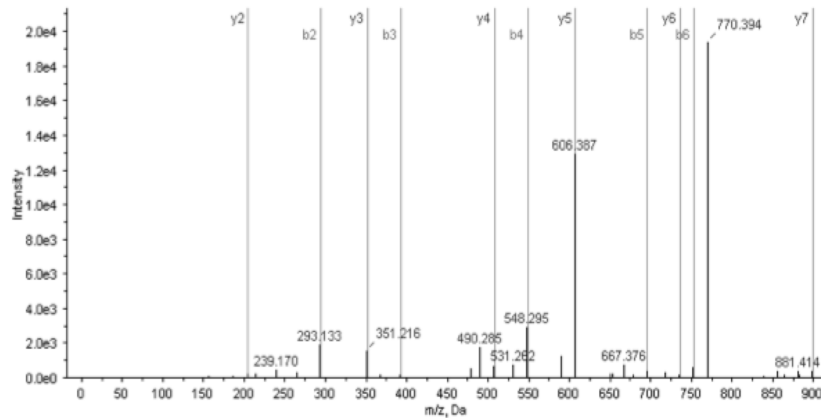

3 (1). A49-K61

| Residue | b         | y         |
|---------|-----------|-----------|
| G       | 58.0287   | 1479.7182 |
| N       | 172.0717  | 1422.6967 |
| E       | 301.1143  | 1308.6538 |
| Q(Dea)  | 430.1569  | 1179.6112 |
| S       | 517.1889  | 1050.5686 |
| V       | 616.2573  | 963.5366  |
| I       | 729.3414  | 864.4682  |
| I       | 842.4254  | 751.3841  |
| M       | 973.4659  | 638.3000  |
| S       | 1060.4979 | 507.2595  |
| C(CAM)  | 1220.5286 | 420.2275  |
| I       | 1333.6126 | 260.1969  |
| K       | 1461.7076 | 147.1128  |

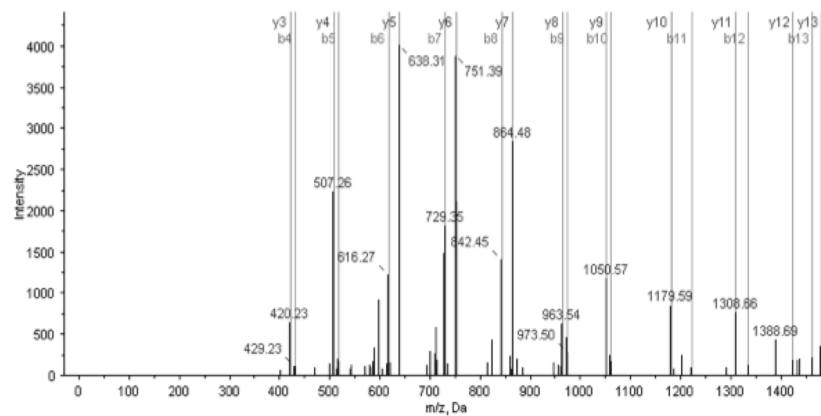

**FIGURE S3.** Nano LC-MS/MS analysis of Con II-tagged Con-P.

MALDI TOF MS/MS analysis was achieved by using an AB SCIEX TOF/TOF 5800 Analyzer after digested with *Achromobacter* protease I and subsequently separated by a nano-LC system. ProteinPilot software with the Paragon method was used for identification. As a result, the 27 peptide fragments were detected with 95% confidence intervals, and 82.3% of rCon-P sequence was covered with non-redundant 10 peptide fragments including QLTINGVPDDSFITNVGK (16-33), YEVRFGK (42-48), ANEQSVIIMSCIK (49-61), DG VVLHTQTETSPFPQK (62-78), SRSFEVSIS (79-87), INSHVMYFSN (97-106), FSNSLDAQDYDIWSHGK (104-121), and VSIEGISIN (122-130). The typical spectra of 10 fragments used for identifying Con-P sequence are shown.

3 (2). A49-K61

| Residue | b         | y         |
|---------|-----------|-----------|
| A       | 72.0444   | 1480.7022 |
| T       | 173.0921  | 1409.6651 |
| E       | 302.1347  | 1308.6174 |
| Q       | 430.1932  | 1179.5748 |
| S       | 517.2253  | 1051.5162 |
| V       | 616.2937  | 964.4842  |
| I       | 729.3777  | 865.4158  |
| I       | 842.4618  | 752.3317  |
| M       | 973.5023  | 639.2477  |
| S       | 1060.5343 | 508.2072  |
| C(CAM)  | 1220.5650 | 421.1751  |
| I       | 1333.6490 | 261.1445  |
| K       | 1462.6916 | 148.0604  |

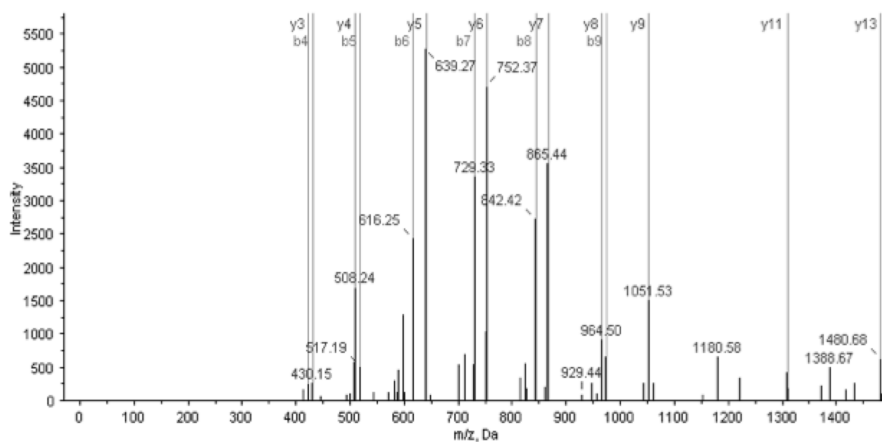

4. D62-K78

| Residue | b         | y         |
|---------|-----------|-----------|
| D       | 116.0342  | 1933.9654 |
| G       | 173.0557  | 1818.9385 |
| V       | 272.1241  | 1761.9170 |
| V       | 371.1925  | 1662.8486 |
| L       | 484.2766  | 1563.7802 |
| H       | 621.3355  | 1450.6961 |
| T       | 722.3832  | 1313.6372 |
| Q       | 850.4417  | 1212.5895 |
| T       | 951.4894  | 1084.5310 |
| E       | 1080.5320 | 983.4833  |
| T       | 1181.5797 | 854.4407  |
| S       | 1268.6117 | 753.3930  |
| F       | 1415.6801 | 666.3610  |
| P       | 1512.7329 | 519.2926  |
| F       | 1659.8013 | 422.2398  |
| Q       | 1787.8599 | 275.1714  |
| K       | 1915.9549 | 147.1128  |

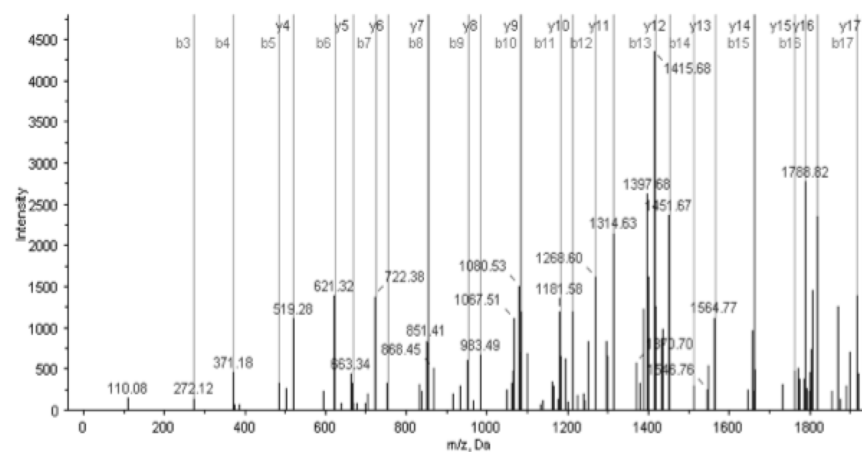

5. S79-S87

| Residue | b        | y         |
|---------|----------|-----------|
| S       | 88.0393  | 1011.5106 |
| R       | 244.1404 | 924.4785  |
| S       | 331.1724 | 768.3774  |
| F       | 478.2409 | 681.3454  |
| E       | 607.2835 | 534.2770  |
| V       | 706.3519 | 405.2344  |
| S       | 793.3839 | 306.1660  |
| I       | 906.4680 | 219.1339  |
| S       | 993.5000 | 106.0499  |

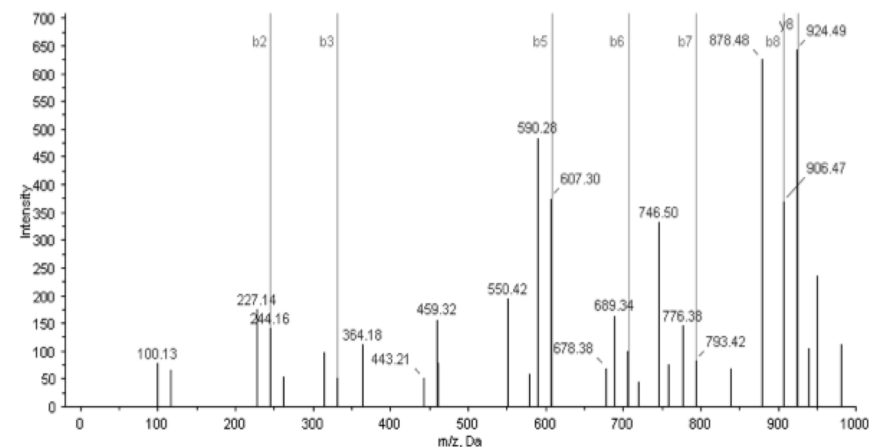

Figure S3 continued.

## 6. I97-N106

| Residue | b         | y         |
|---------|-----------|-----------|
| I       | 114.0913  | 1211.5514 |
| N       | 228.1343  | 1098.4673 |
| S       | 315.1663  | 984.4244  |
| H       | 452.2252  | 897.3923  |
| V       | 551.2936  | 760.3334  |
| M       | 682.3341  | 661.2650  |
| Y       | 845.3974  | 530.2245  |
| F       | 992.4658  | 367.1612  |
| S       | 1079.4979 | 220.0928  |
| N       | 1193.5408 | 133.0608  |

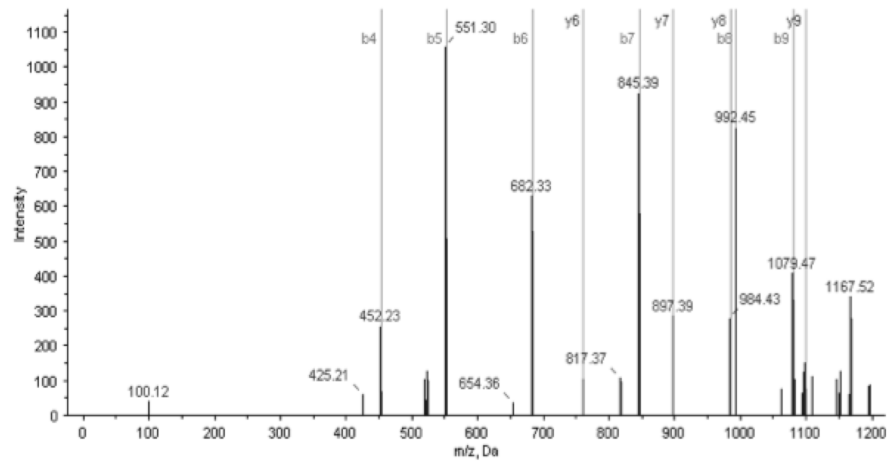

## F104-K121

| Residue | b         | y         |
|---------|-----------|-----------|
| F       | 148.0757  | 2146.9352 |
| S       | 235.1077  | 1999.8668 |
| N       | 349.1506  | 1912.8348 |
| S       | 436.1827  | 1798.7919 |
| L       | 549.2667  | 1711.7598 |
| D       | 664.2927  | 1598.6758 |
| A       | 735.3308  | 1483.6488 |
| Q(Dea)  | 864.3734  | 1412.6117 |
| D       | 979.4003  | 1283.5691 |
| Y       | 1142.4637 | 1168.5422 |
| D       | 1257.4906 | 1005.4789 |
| Y       | 1420.5539 | 890.4519  |
| I       | 1533.6380 | 727.3886  |
| W       | 1719.7173 | 614.3045  |
| S       | 1806.7493 | 428.2252  |
| H       | 1943.8082 | 341.1932  |
| G       | 2000.8297 | 204.1343  |
| K       | 2128.9247 | 147.1128  |

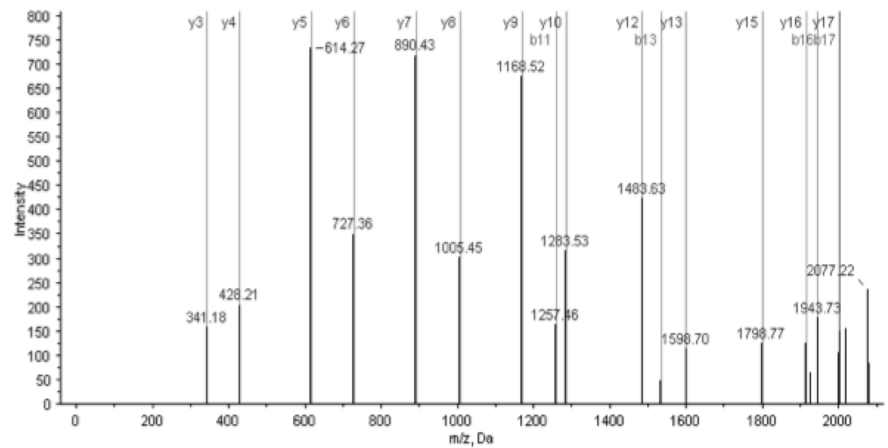

## V122-N130

| Residue | b        | y        |
|---------|----------|----------|
| V       | 100.0757 | 953.4914 |
| S       | 187.1077 | 854.4230 |
| I       | 300.1918 | 767.3910 |
| E (NaX) | 451.2163 | 654.3069 |
| G       | 508.2378 | 503.2824 |
| I       | 621.3218 | 446.2609 |
| S       | 708.3539 | 333.1769 |
| I       | 821.4379 | 246.1448 |
| N       | 935.4809 | 133.0608 |

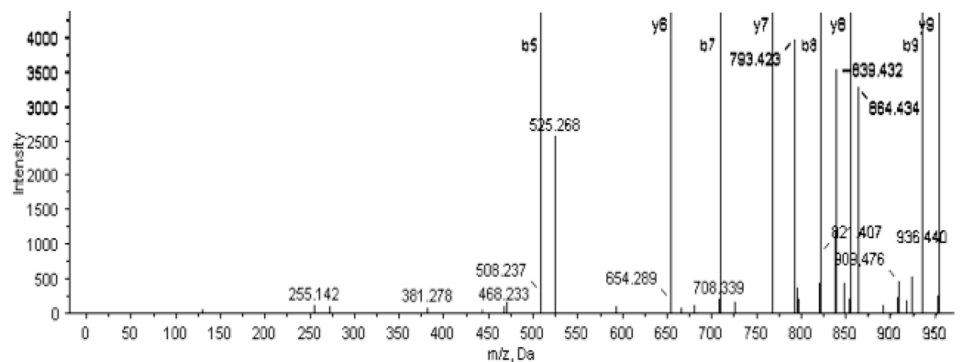

FIGURE S3 continued.
