# Supplementary material
Source: PubMed Central journal article supplement (PMC3438938)
Supplement: supp_M112.346213_jbc.M112.346213-5.pdf [file supp_M112.346213_jbc.M112.346213-5.pdf]

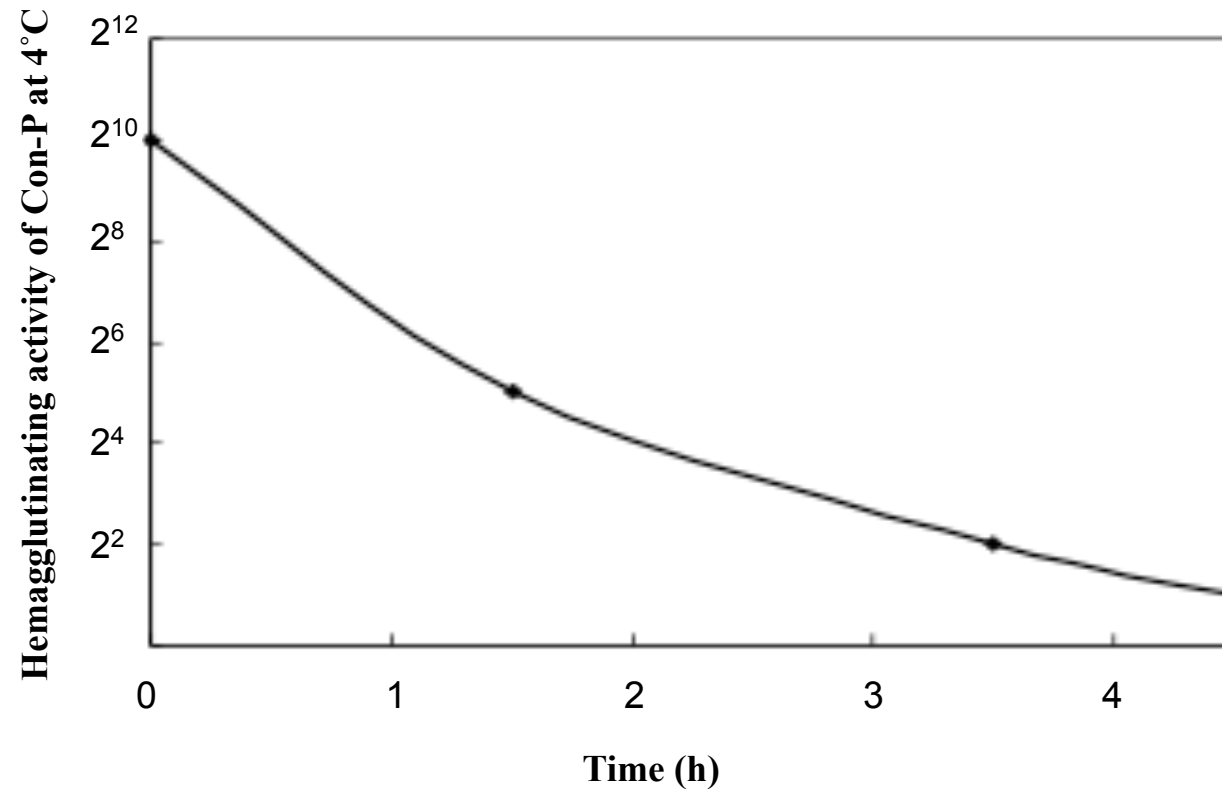

**FIGURE S4.** Stability of recombinant Con-P.  
The stability of Con-P was assessed by hemagglutinating activity against rabbit erythrocyte after incubation for indicated time interval at 4°C.
