# Supplementary material
Source: PubMed Central journal article supplement (PMC3438938)
Supplement: supp_M112.346213_jbc.M112.346213-6.pdf [file supp_M112.346213_jbc.M112.346213-6.pdf]

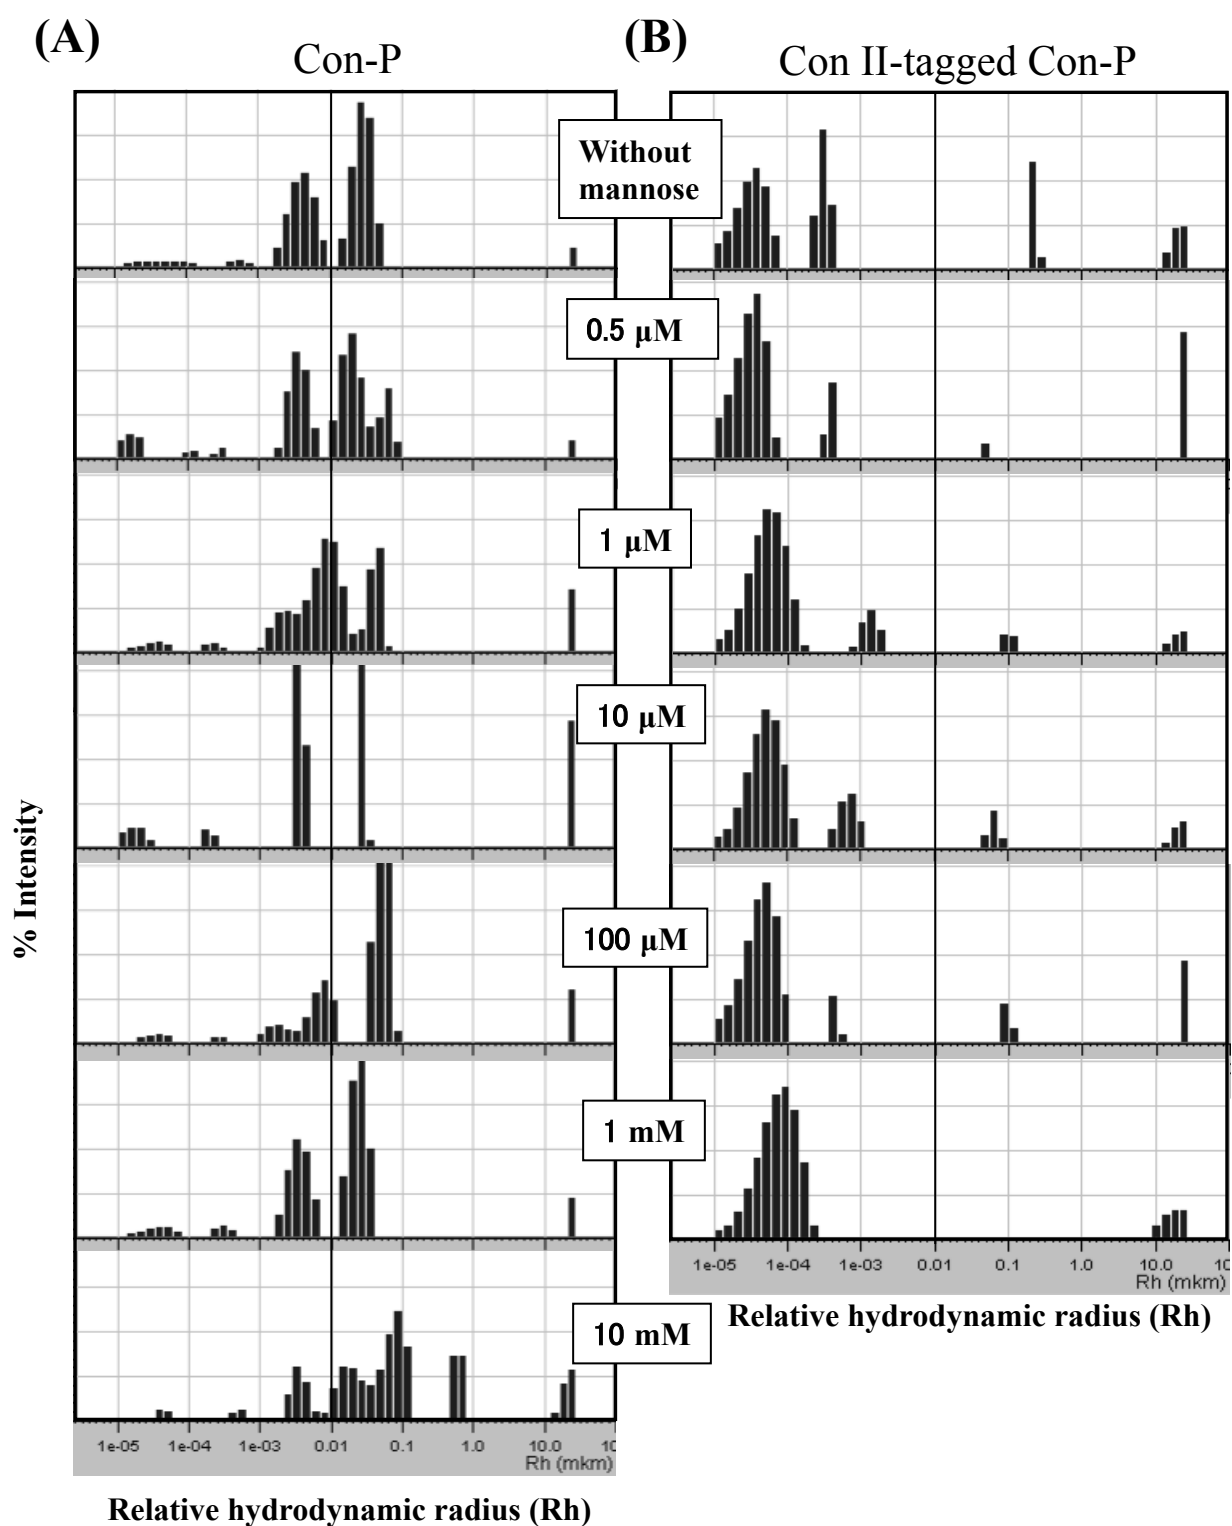

**FIGURE S5.** Distribution of apparent molecular weight of Con-P (A) and Con II-tagged Con-P (B). Particle size was calculated by a dynamic light scattering technique at each mannose concentration. The horizontal axis indicates the relative value of hydrodynamic radius (Rh), and the vertical axis indicates the % intensity.
