# Supplementary material
Source: PubMed Central journal article supplement (PMC3438938)
Supplement: supp_M112.346213_jbc.M112.346213-7.pdf [file supp_M112.346213_jbc.M112.346213-7.pdf]

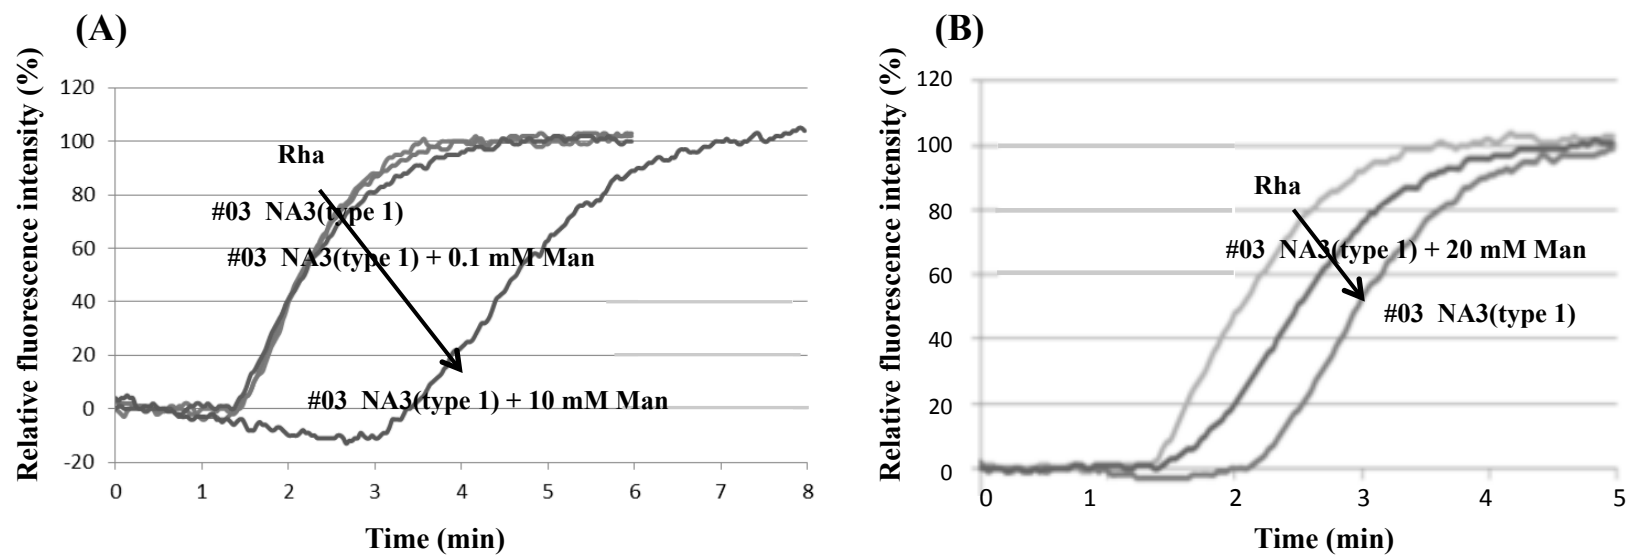

**FIGURE S6.** Elution profiles of FACS analysis of Con-P (A) and Con II-tagged Con-P (B) for PA-sugar No. 3, NA3 (type1), with and without mannose. PA-rhamnose (Rha) was used as a negative control.
