# Supplementary material
Source: PubMed Central journal article supplement (PMC3438938)
Supplement: supp_M112.346213_jbc.M112.346213-8.pdf [file supp_M112.346213_jbc.M112.346213-8.pdf]

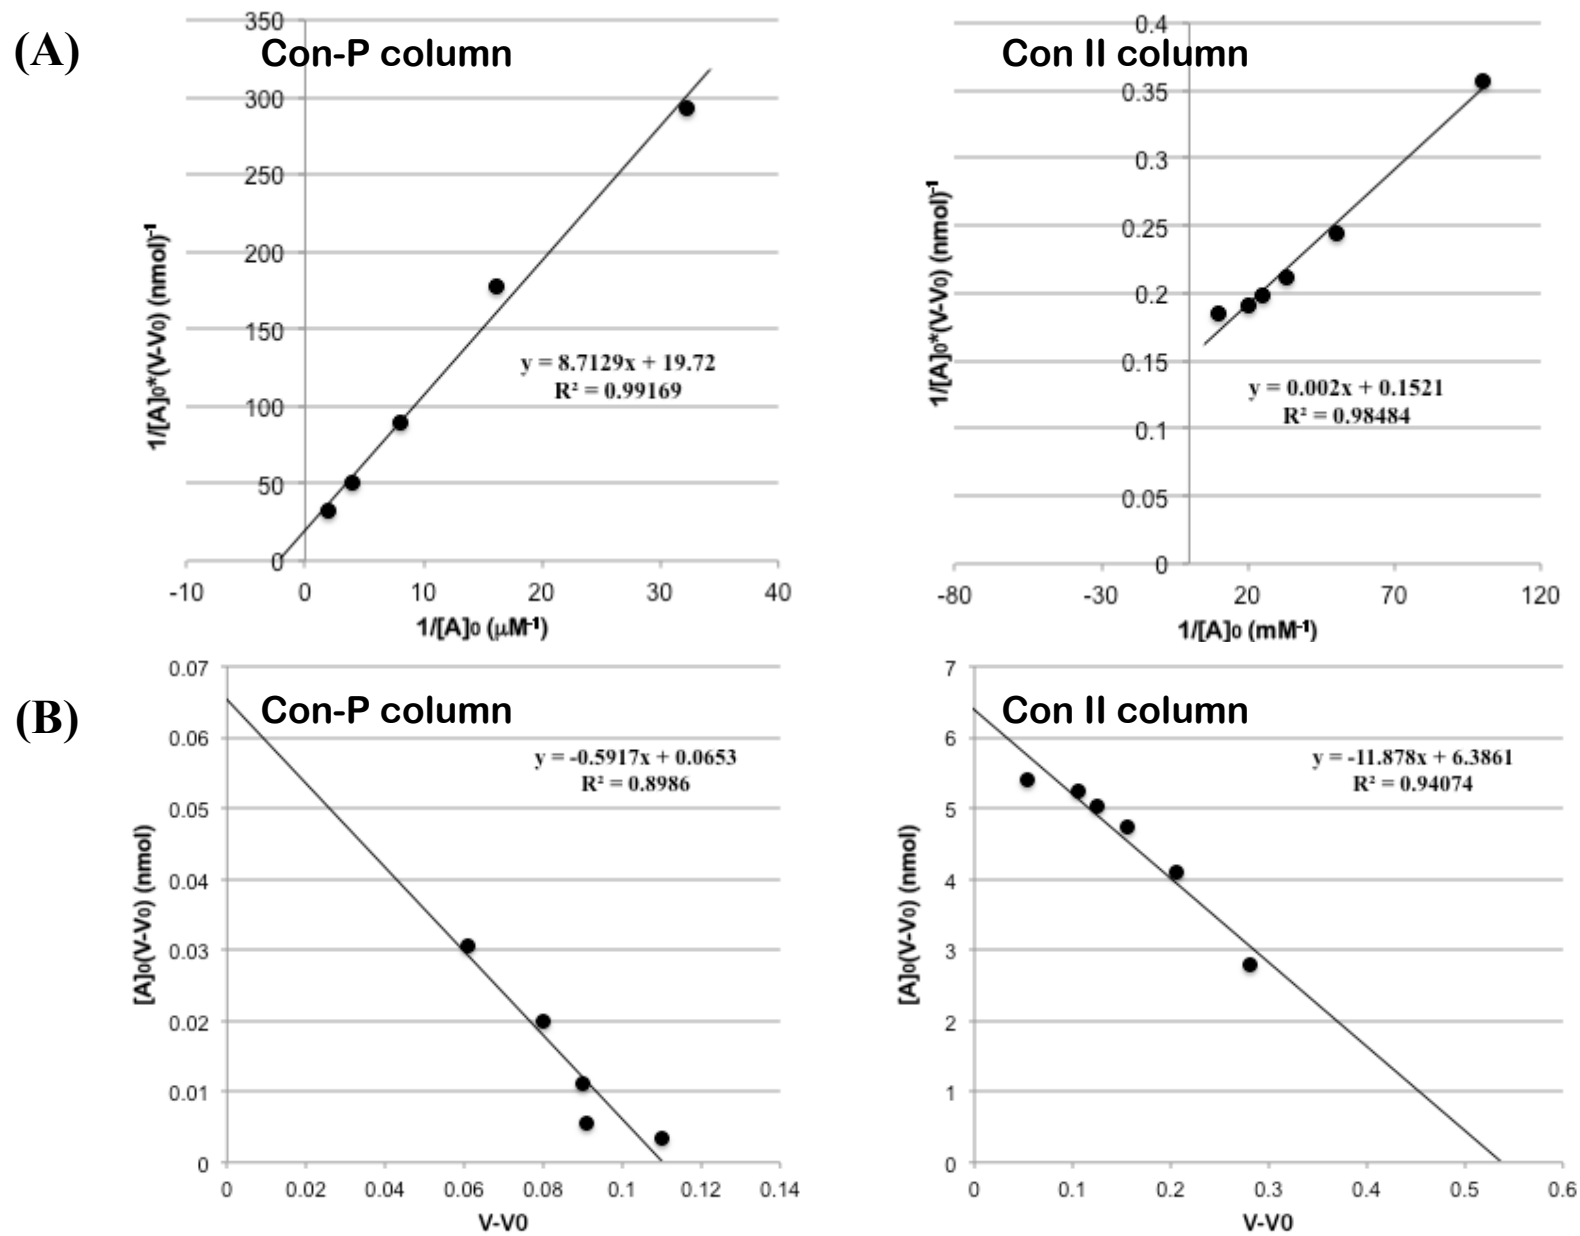

**FIGURE S7.** Determination of the column binding capacity ( $Bt$ ) for Con-P conjugated (Con-P) and Con II conjugated (Con II) columns by Lineweaver-Burk plots (A) and Woolfe-Hofstee-type plots (B).
