# Supplementary material
Source: PubMed Central journal article supplement (PMC3438938)
Supplement: supp_M112.346213_jbc.M112.346213-9.pdf [file supp_M112.346213_jbc.M112.346213-9.pdf]

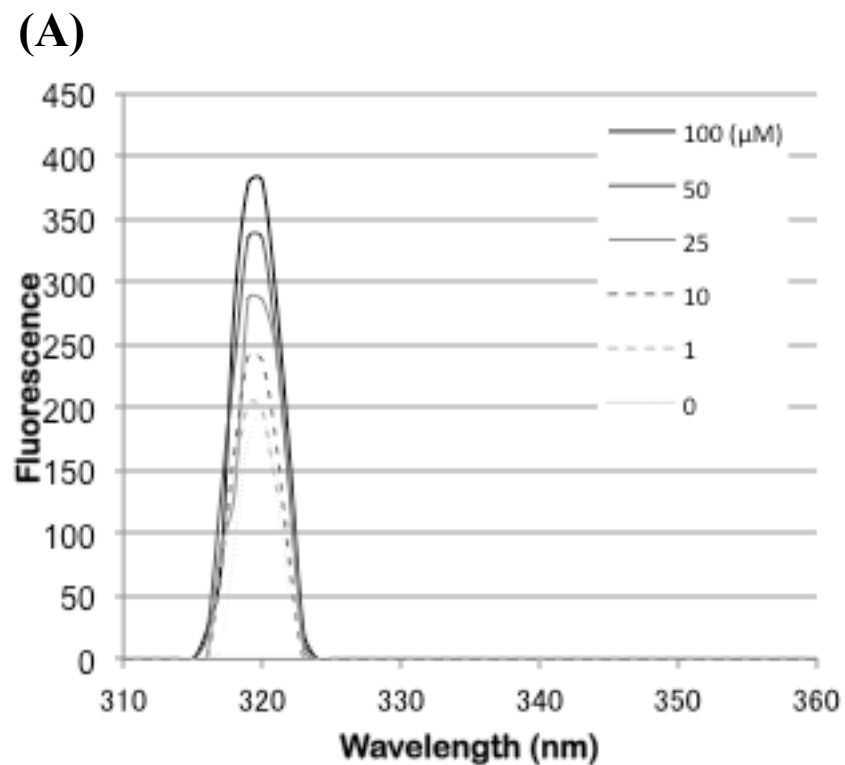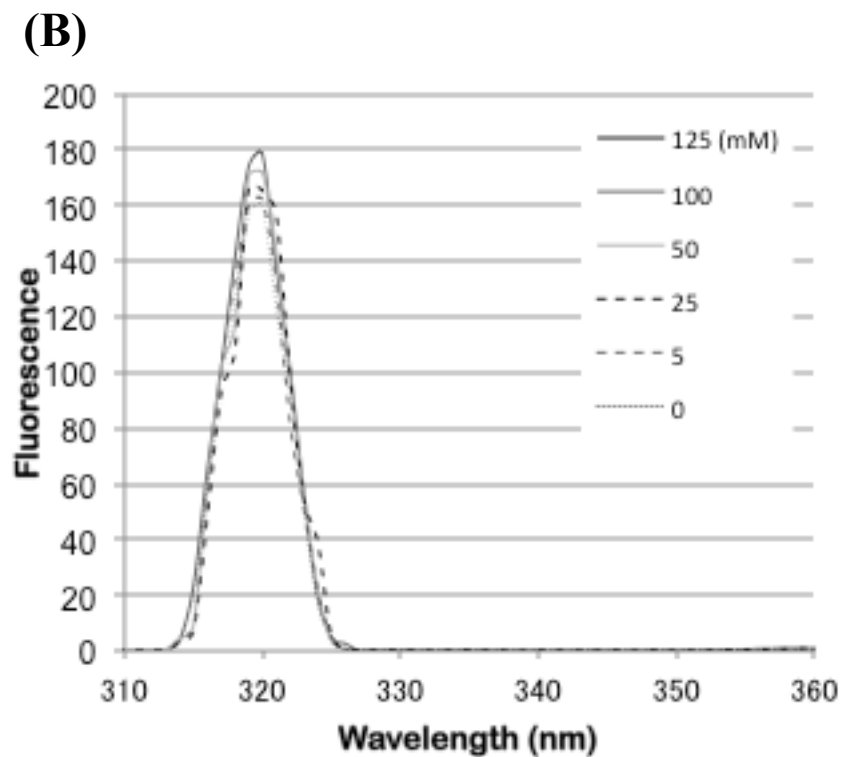

**FIGURE S8.** Fluorescence spectra of Con-P with mannose titration. Mannose was titrated to the sample solution at concentration ranging from 1 to 100 mM (A) and 5 to 125 mM (B), respectively.
