# Supplementary material
Source: PubMed Central journal article supplement (PMC3438938)
Supplement: supp_M112.346213_jbc.M112.346213-10.pdf [file supp_M112.346213_jbc.M112.346213-10.pdf]

(A)

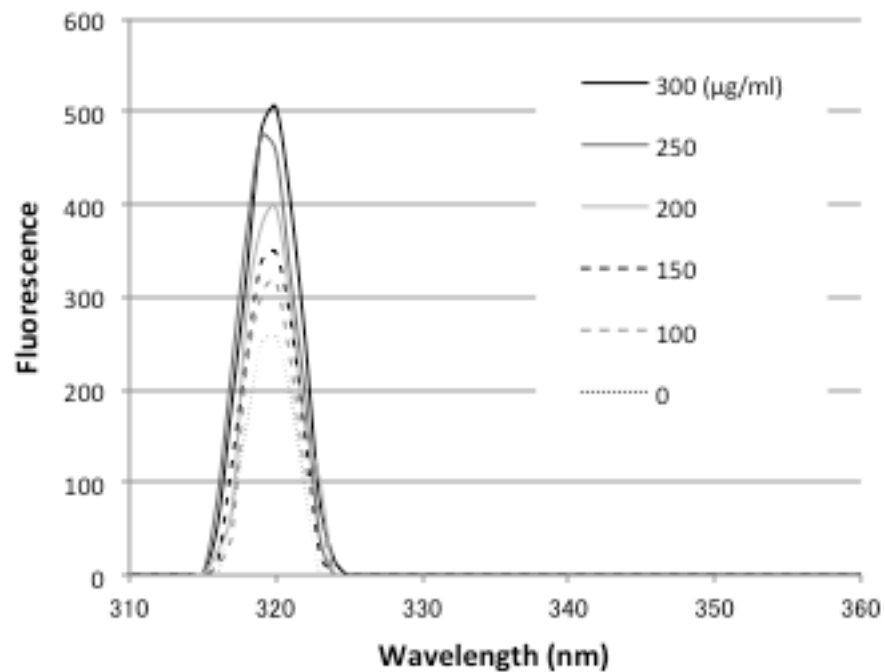

(B)

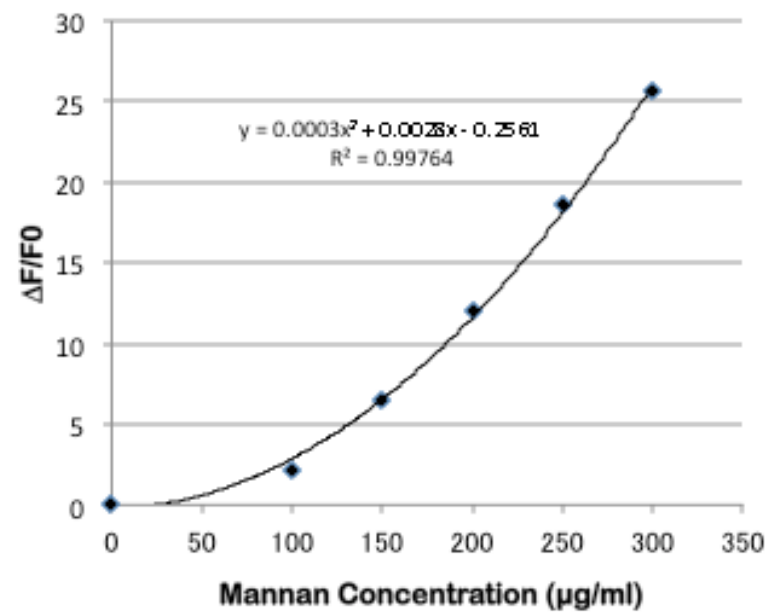

**FIGURE S9.** Fluorescence spectra of Con-P (A) and the titration curve of yeast mannan (B). Yeast mannan was titrated to the sample solution at concentration ranging from 100 to 300 mg/ml.
