# Supplementary material
Source: PubMed Central journal article supplement (PMC3438938)
Supplement: supp_M112.346213_jbc.M112.346213-11.pdf [file supp_M112.346213_jbc.M112.346213-11.pdf]

**Table S1** *K*<sub>a</sub> values of Congerin P, Con I, and Con II toward 22 PA-sugars determined by FAC analysis

| PA-sugar No. | <i>K</i> <sub>a</sub> values (μM <sup>-1</sup> ) |       |        |
|--------------|--------------------------------------------------|-------|--------|
|              | Con-P                                            | Con I | Con II |
| 2            | 4.77                                             | 2.78  | 0.43   |
| 3            | 5.60                                             | 4.10  | 0.69   |
| 4            | 4.93                                             | 2.75  | 0.44   |
| 9            | 1.60                                             | 1.97  | 0.21   |
| 10           | 3.47                                             | 2.41  | 0.38   |
| 13           | 0.77                                             | 0     | 0      |
| 21           | 0.48                                             | 0.81  | 0.08   |
| 22           | 0.48                                             | 0.73  | 0.07   |
| 23           | 0.16                                             | 0     | 0      |
| 41           | 1.14                                             | 1.04  | 0.11   |
| 42           | 3.33                                             | 3.27  | 0.4    |
| 43           | 0.91                                             | 2.87  | 0.4    |
| 27           | 0.03                                             | 0     | 0      |
| 31           | 0.08                                             | 0     | 0      |
| 38           | 0.02                                             | 0     | 0      |
| 40           | 0.50                                             | 0     | 0.013  |
| 49           | 0.42                                             | ND    | ND     |
| 16           | 0.40                                             | ND    | ND     |
| 17           | 0.10                                             | ND    | ND     |
| 18           | 1.38                                             | ND    | ND     |
| 20           | 0.37                                             | ND    | ND     |
| 59           | 0.56                                             | ND    | ND     |
