# Supplementary material
Source: PubMed Central journal article supplement (PMC3438938)
Supplement: supp_M112.346213_jbc.M112.346213-12.pdf [file supp_M112.346213_jbc.M112.346213-12.pdf]

**Table S2 Amount of the conjugated protein on Con-P-conjugated and Con II-conjugated columns used for FAC analysis**

|               | Amount of conjugated protein* |              | <i>Bt</i> (nmol) | (%)         |
|---------------|-------------------------------|--------------|------------------|-------------|
|               | ( $\mu$ g/column)             | (nmol)       |                  |             |
| <b>Con-P</b>  | <b>4.0</b>                    | <b>0.274</b> | <b>0.065</b>     | <b>23.7</b> |
| <b>Con II</b> | <b>185.0</b>                  | <b>12.0</b>  | <b>6.4</b>       | <b>53.2</b> |

\*Protein concentration was determined by BCA assay.
